# Supplementary material
Source: PubMed Central journal article supplement (PMC5655530)
Supplement: 10.1074_M117.790378_jbc.M117.790378-1.pdf [file 10.1074_M117.790378_jbc.M117.790378-1.pdf]

# Supplemental Table 1

## Top canonical pathways representing genes that are positively regulated by both TNF- $\alpha$ and TonEBP, as identified by Ingenuity Pathway Analysis

| Canonical Pathway                                         | Molecules                                                           | $-\log(p\text{-value})$ |
|-----------------------------------------------------------|---------------------------------------------------------------------|-------------------------|
| Granulocyte Adhesion and Diapedesis                       | CXCL3, MMP3, CCL3, MMP10, CCL20, MMP13, IL1B, MMP9, CCL7, TNFRSF11B | 1.16E01                 |
| Agranulocyte Adhesion and Diapedesis                      | CXCL3, MMP3, CCL3, MMP10, CCL20, MMP13, IL1B, MMP9, CCL7            | 9.86E00                 |
| Inhibition of Matrix Metalloproteases                     | MMP3, TIMP1, MMP10, MMP13, MMP9                                     | 7.07E00                 |
| Hepatic Fibrosis / Hepatic Stellate Cell Activation       | CXCL3, TIMP1, MMP13, IL1B, MMP9, TNFRSF11B                          | 4.87E00                 |
| HIF1 $\alpha$ Signaling                                   | MMP3, MMP10, MMP13, EGLN3, MMP9                                     | 4.72E00                 |
| LXR/RXR Activation                                        | HPX, IL1B, PTGS2, MMP9, TNFRSF11B                                   | 4.61E00                 |
| Role of IL-17A in Arthritis                               | CXCL3, CCL20, MMP13, PTGS2                                          | 4.4E00                  |
| TREM1 Signaling                                           | TLR2, CXCL3, IL1B, CD83                                             | 4.2E00                  |
| Colorectal Cancer Metastasis Signaling                    | TLR2, MMP3, MMP10, MMP13, PTGS2, MMP9                               | 4.14E00                 |
| Bladder Cancer Signaling                                  | MMP3, MMP10, MMP13, MMP9                                            | 3.95E00                 |
| Communication between Innate and Adaptive Immune Cells    | TLR2, CCL3L3, IL1B, CD83                                            | 3.91E00                 |
| Dendritic Cell Maturation                                 | TLR2, IL1B, CD83, IL23A, TNFRSF11B                                  | 3.68E00                 |
| Airway Pathology in Chronic Obstructive Pulmonary Disease | CXCL3, MMP9                                                         | 3.65E00                 |
| Role of IL-17F in Allergic Inflammatory Airway Diseases   | MMP13, IL1B, IL11                                                   | 3.57E00                 |
| Prostanoid Biosynthesis                                   | PTGES, PTGS2                                                        | 3.55E00                 |

# Supplemental Table 2

## Top diseases and biological functions representing genes that are positively regulated by both TNF- $\alpha$ and TonEBP, as identified by Ingenuity Pathway Analysis

| Category                                      | Top Diseases and Biological Functions          | p-value             | # Molecules |
|-----------------------------------------------|------------------------------------------------|---------------------|-------------|
| Diseases and Disorders                        | Inflammatory Response                          | 7.13E-04 - 1.00E-13 | 31          |
|                                               | Respiratory Disease                            | 2.85E-04 - 2.78E-13 | 18          |
|                                               | Connective Tissue Disorders                    | 5.79E-04 - 4.24E-12 | 23          |
|                                               | Inflammatory Disease                           | 5.19E-04 - 4.24E-12 | 26          |
|                                               | Skeletal and Muscular Disorders                | 5.79E-04 - 4.24E-12 | 27          |
| Molecular and Cellular Functions              | Cell Death and Survival                        | 7.07E-04 - 7.35E-11 | 32          |
|                                               | Cell-To-Cell Signaling and Interaction         | 7.13E-04 - 1.89E-10 | 24          |
|                                               | Cellular Movement                              | 7.13E-04 - 2.17E-10 | 25          |
|                                               | Cellular Growth and Proliferation              | 6.73E-04 - 1.53E-09 | 35          |
|                                               | Cellular Development                           | 6.88E-04 - 8.58E-09 | 34          |
| Physiological System Development and Function | Hematological System Development and Function  | 7.13E-04 - 1.00E-13 | 30          |
|                                               | Tissue Morphology                              | 5.22E-04 - 1.00E-13 | 29          |
|                                               | Immune Cell Trafficking                        | 7.13E-04 - 1.16E-12 | 22          |
|                                               | Tissue Development                             | 6.88E-04 - 1.16E-12 | 26          |
|                                               | Cardiovascular System Development and Function | 3.55E-04 - 1.89E-10 | 24          |

## Supplemental Table 3

### Top networks representing genes that are positively regulated by both TNF- $\alpha$ and TonEBP, as identified by Ingenuity Pathway Analysis

| Network                                                                                                                  | Focus Molecules | Score |
|--------------------------------------------------------------------------------------------------------------------------|-----------------|-------|
| Hematological System Development and Function, Inflammatory Response, Tissue Morphology                                  | 19              | 38    |
| Cardiac Infarction, Cardiovascular Disease, Organismal Injury and Abnormalities                                          | 13              | 23    |
| Humoral Immune Response, Protein Synthesis, Tissue Development                                                           | 10              | 16    |
| Cellular Growth and Proliferation, Organismal Development, Connective Tissue Development and Function                    | 7               | 10    |
| Cellular Movement, Connective Tissue Development and Function, Tissue Development                                        | 5               | 7     |
| Lipid Metabolism, Post-Translational Modification, Protein Degradation                                                   | 1               | 2     |
| Cardiovascular Disease, Embryonic Development, Molecular Transport                                                       | 1               | 2     |
| Cancer, Cardiovascular Disease, Cell Morphology                                                                          | 1               | 2     |
| Connective Tissue Disorders, Developmental Disorder, Hereditary Disorder                                                 | 1               | 2     |
| Cellular Assembly and Organization, Cell-To-Cell Signaling and Interaction, Reproductive System Development and Function | 1               | 2     |

**Supplemental Table 4.** Details for human tissue samples used in immunohistochemical and gene expression analyses. PM: Post-mortem.

|    | Sample | Source   | Age | IVD Level | Average Grade | Classification | RT-qPCR | IHC |
|----|--------|----------|-----|-----------|---------------|----------------|---------|-----|
| HD | 1      | Surgical | 42  | L4/L5     | 3             | Non-degenerate | ✓       | ✓   |
| HD | 2      | Surgical | 40  | L5/S1     | 3.9           | Non-degenerate | ✓       |     |
| HD | 3      | Surgical | 25  | L4/L5     | 4.8           | Degenerate     | ✓       |     |
| HD | 5      | Surgical | 33  | L5/S1     | 9             | Degenerate     | ✓       |     |
| HD | 16     | Surgical | 41  | L5/S1     | 7             | Degenerate     | ✓       |     |
| HD | 17     | Surgical | 44  | L5/S1     | 4             | Non-degenerate | ✓       |     |
| HD | 21     | Surgical | 25  | L5/S1     | 4             | Non-degenerate | ✓       |     |
| HD | 22     | Surgical | 23  | L5/S1     | 3             | Non-degenerate | ✓       |     |
| HD | 23     | Surgical | 29  | L3/L4     | 7.8           | Degenerate     | ✓       |     |
| HD | 24     | Surgical | 35  | L4/L5     | 2             | Non-degenerate | ✓       |     |
| HD | 25     | Surgical | 20  | L4/L5     | 2             | Non-degenerate | ✓       |     |
| HD | 26     | Surgical | 40  | L5/S1     | 5             | Degenerate     | ✓       |     |
| HD | 30     | PM       | 45  | L5/S1     | 2             | Non-degenerate | ✓       |     |
| HD | 31     | PM       | 45  | L3/L4     | 1             | Non-degenerate | ✓       |     |
| HD | 33     | Surgical | 48  | L4/L5     | 8             | Degenerate     | ✓       |     |
| HD | 34     | Surgical | 26  | L5/S1     | 12            | Degenerate     | ✓       |     |
| HD | 36     | Surgical | 33  | L5/S1     | 9             | Degenerate     | ✓       |     |
| HD | 40     | PM       | 74  | L2/L3     | 11            | Degenerate     |         | ✓   |
| HD | 44     | Surgical | 41  | L5/S1     | 2             | Non-degenerate | ✓       | ✓   |
| HD | 45     | Surgical | 36  | L5/S1     | 8             | Degenerate     | ✓       |     |
| HD | 53     | Surgical | 38  | L5/S1     | 7             | Degenerate     | ✓       |     |
| HD | 54     | Surgical | 28  | L4/L5     | 6             | Degenerate     | ✓       |     |
| HD | 56     | Surgical | 43  | L5/S1     | 8             | Degenerate     | ✓       |     |
| HD | 57     | Surgical | 44  | L5/S1     | 9             | Degenerate     | ✓       |     |
| HD | 58     | Surgical | 28  | L5/S1     | 8             | Degenerate     | ✓       |     |
| HD | 59     | Surgical | 35  | L5/S1     | 6             | Degenerate     | ✓       |     |
| HD | 61     | Surgical | 43  | L5/S1     | 7             | Degenerate     | ✓       |     |
| HD | 63     | Surgical | 42  | L5/S1     | 5             | Degenerate     | ✓       |     |
| HD | 65     | Surgical | 43  | L4/L5     | 10            | Degenerate     | ✓       | ✓   |
| HD | 66     | Surgical | 62  | L3/L4     | 10            | Degenerate     | ✓       |     |
| HD | 85     | Surgical | 49  | L2/L3     | 8             | Degenerate     | ✓       |     |
| HD | 86     | Surgical | 40  | L5/S1     | 9             | Degenerate     | ✓       |     |
| HD | 92     | Surgical | 38  | L5/S1     | 7             | Degenerate     | ✓       |     |
| HD | 93     | Surgical | 38  | L5/S1     | 12            | Degenerate     | ✓       |     |
| HD | 94     | Surgical | 66  | L5/S1     | 10            | Degenerate     | ✓       |     |
| HD | 97     | Surgical | 46  | L5/S1     | 10            | Degenerate     | ✓       |     |
| HD | 98     | Surgical | 65  | L3/L4     | 11            | Degenerate     | ✓       | ✓   |
| HD | 144    | Surgical | 37  | L5/S1     | 5.5           | Degenerate     | ✓       |     |
| HD | 145    | Surgical | 38  | L4/L5     | 11            | Degenerate     | ✓       | ✓   |
| HD | 146    | Surgical | 47  | L5/S1     | 7             | Degenerate     | ✓       |     |
| HD | 151    | Surgical | 47  | L5/S1     | 8.5           | Degenerate     | ✓       |     |

|    |     |          |    |       |     |                |   |   |
|----|-----|----------|----|-------|-----|----------------|---|---|
| HD | 153 | Surgical | 30 | L5/S1 | 5   | Degenerate     | ✓ |   |
| HD | 154 | Surgical | 52 | L4/L5 | 11  | Degenerate     | ✓ | ✓ |
| HD | 194 | Surgical | 35 | L4/L5 | 11  | Degenerate     |   | ✓ |
| HD | 203 | Surgical | 45 | L5/S1 | 4   | Non-degenerate |   | ✓ |
| HD | 233 | Surgical | 44 | L5/S1 | 10  | Degenerate     |   | ✓ |
| HD | 234 | Surgical | 54 | L5/S1 | 9   | Degenerate     |   | ✓ |
| HD | 254 | Surgical | 47 | L4/L5 | 6   | Degenerate     |   | ✓ |
| HD | 257 | Surgical | 46 | L5/S1 | 3   | Non-degenerate |   | ✓ |
| HD | 266 | Surgical | 27 | L5/S1 | 4   | Non-degenerate |   | ✓ |
| HD | 270 | Surgical | 45 | L5/S1 | 6   | Degenerate     |   | ✓ |
| HD | 287 | Surgical | 46 | L5/S1 | 5   | Degenerate     |   | ✓ |
| HD | 310 | Surgical | 37 | L4/L5 | 5   | Degenerate     |   | ✓ |
| HD | 319 | Surgical | 47 | L5/S1 | 5   | Degenerate     |   | ✓ |
| HD | 330 | Surgical | 32 | L5/S1 | 5.5 | Degenerate     |   | ✓ |
| HD | 332 | Surgical | 24 | L5/S1 | 10  | Degenerate     |   | ✓ |
| HD | 342 | Surgical | 18 | L4/L5 | 6   | Degenerate     |   | ✓ |
| HD | 346 | Surgical | 46 | C5/C6 | 6   | Degenerate     |   | ✓ |
| HD | 350 | Surgical | 38 | L4/L5 | 9   | Degenerate     |   | ✓ |
| HD | 356 | Surgical | 26 | L5/S1 | 4   | Non-degenerate |   | ✓ |
| HD | 359 | Surgical | 40 | L5/S1 | 4   | Non-degenerate |   | ✓ |
| HD | 360 | Surgical | 50 | C6    | 5.5 | Degenerate     |   | ✓ |
| HD | 374 | Surgical | 37 | L4/L5 | 4   | Non-degenerate |   | ✓ |
| HD | 378 | PM       | 33 | L4/L5 | 2   | Non-degenerate |   | ✓ |

# Supplemental Figure 1

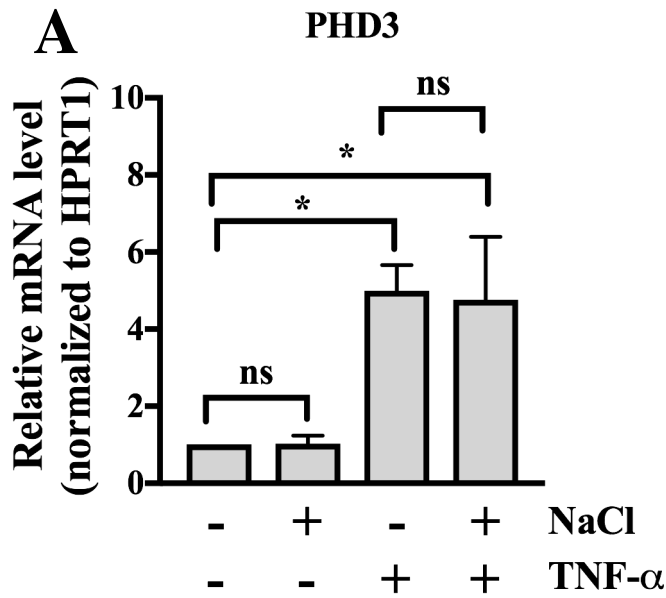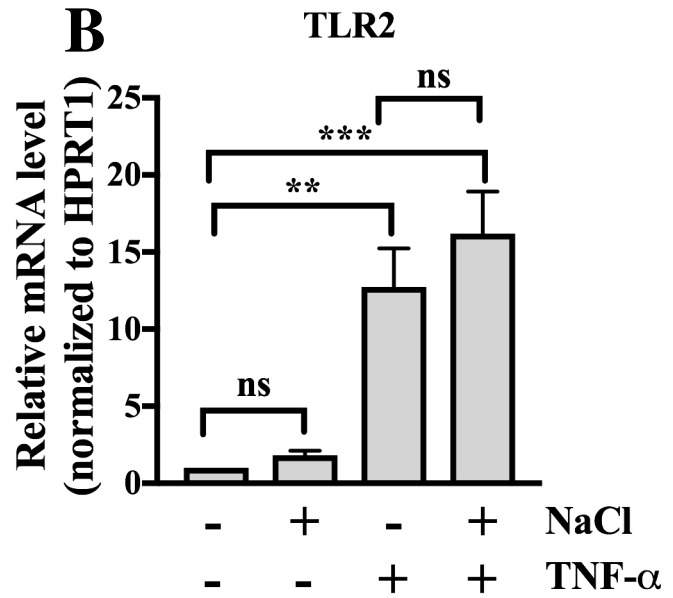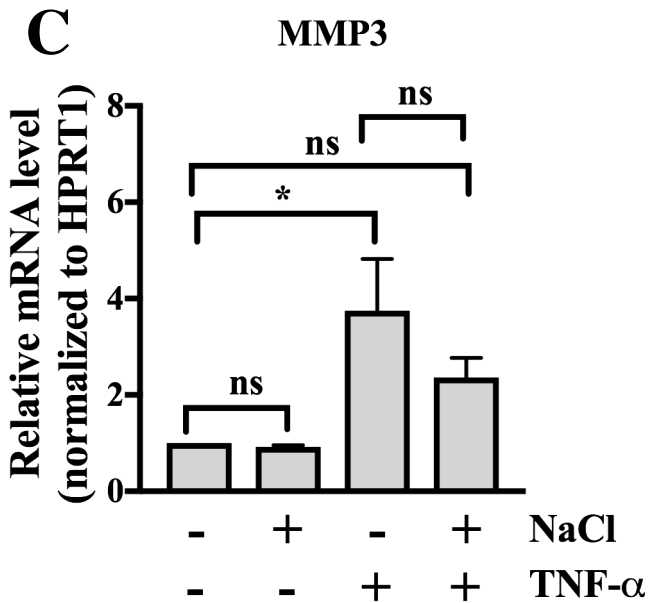

**Inflammatory gene response to co-stimulation with hyperosmolarity and TNF- $\alpha$ .** A-C) While NaCl had no effect on mRNA levels of *PHD3* (A), *TLR2* (B), or *MMP3* (C), treatment with TNF- $\alpha$  induced levels of all three transcripts. Co-treatment with NaCl and TNF- $\alpha$  did not affect inducibility of *PHD3* (A) or *TLR2* (B). TNF- $\alpha$ -mediated induction of *MMP3* was reduced by co-treatment with NaCl.

# Supplemental Figure 2

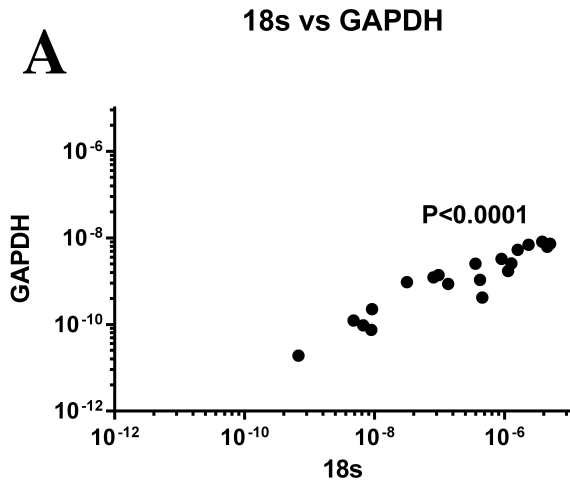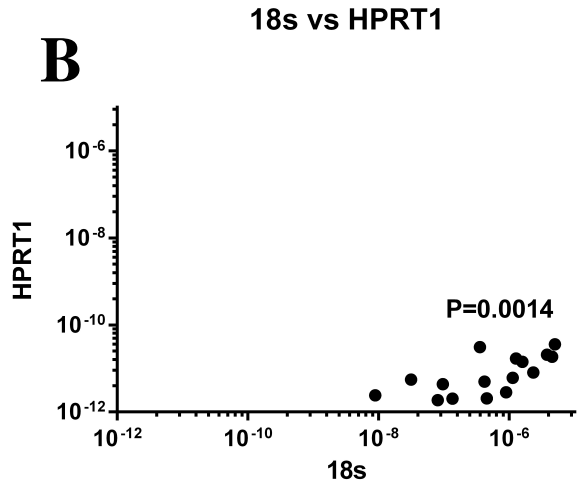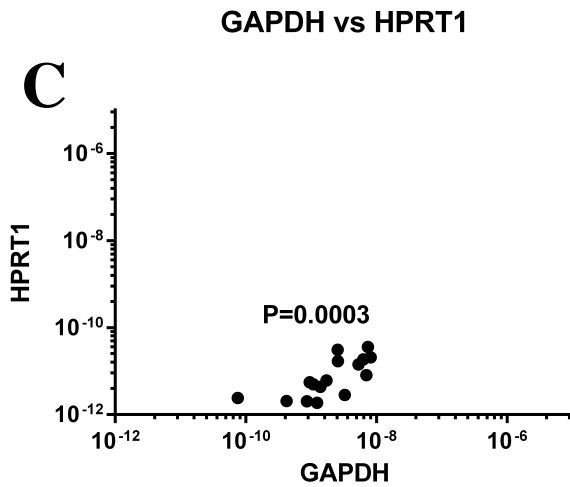

**Correlation between housekeeping gene expression in human NP samples. A-C) Strong positive correlation between expression levels of 18s and GAPDH (A), 18s and HPRT1 (B), and GAPDH and HPRT1 (C).**
